# Supplementary material
Source: PubMed Central journal article supplement (PMC4259223)
Supplement: f-70-01612-sup1.pdf [file f-70-01612-sup1.pdf]

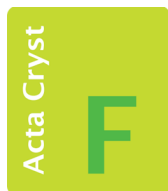

STRUCTURAL BIOLOGY  
COMMUNICATIONS

**Volume 70 (2014)**

**Supporting information for article:**

**Crystallization and preliminary crystallographic study of *Feline infectious peritonitis virus* main protease in complex with an inhibitor**

**Jinshan Wang, Fenghua Wang, Yusheng Tan, Xia Chen, Qi Zhao, Sheng Fu, Shuang Li, Cheng Chen and Haitao Yang**

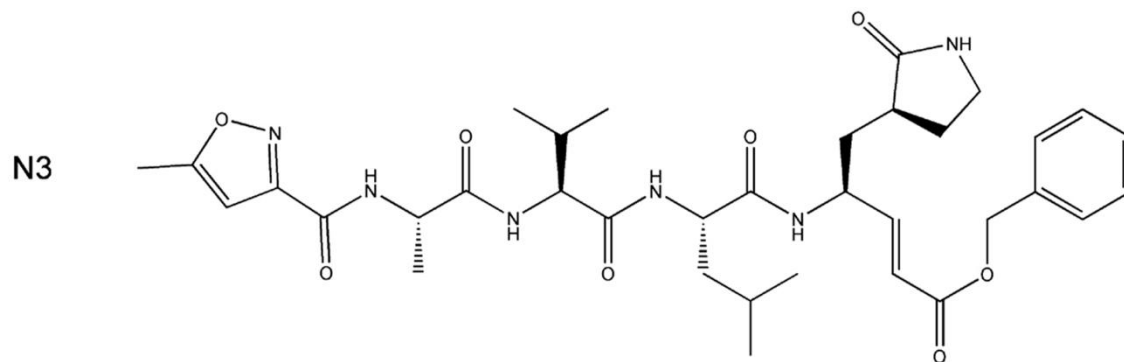

**Figure S1** Chemical structure of the compound N3.
